# Supplementary material
Source: Research Square preprint supplement (doi:10.21203/rs.3.rs-8947026/v1)
Supplement: Supplementary file 1 [file f5e1413354209463600c9e5a.docx]

**Table S1. LOOCV performance comparison across candidate surrogate model families (DoE-scale training dataset).**

| **Target** | **Model** | **R²** | **RMSE** | **MAE** |
| --- | --- | --- | --- | --- |
| Burst40 | PolyRidge2 | 0.877 | 4.282 | 3.365 |
| Burst40 | PolyRidge3 | 0.634 | 7.375 | 5.499 |
| Burst40 | XGB_reg | 0.483 | 8.762 | 6.877 |
| Burst40 | XGB | 0.463 | 8.933 | 7.001 |
| Burst40 | ET | 0.431 | 9.192 | 6.824 |
| Burst40 | RF | 0.398 | 9.459 | 7.806 |
| Burst40 | RF_leaf2 | 0.333 | 9.958 | 8.554 |
| EE | PolyRidge3 | 0.937 | 1.520 | 1.209 |
| EE | PolyRidge2 | 0.891 | 2.005 | 1.621 |
| EE | XGB_reg | 0.824 | 2.549 | 1.973 |
| EE | XGB | 0.804 | 2.690 | 2.076 |
| EE | ET | 0.613 | 3.779 | 2.984 |
| EE | RF | 0.463 | 4.451 | 3.403 |
| EE | RF_leaf2 | 0.439 | 4.547 | 3.526 |
| Size | PolyRidge3 | 0.938 | 0.194 | 0.155 |
| Size | PolyRidge2 | 0.866 | 0.284 | 0.227 |
| Size | XGB | 0.853 | 0.298 | 0.218 |
| Size | XGB_reg | 0.852 | 0.300 | 0.222 |
| Size | RF | 0.761 | 0.380 | 0.306 |
| Size | ET | 0.738 | 0.398 | 0.336 |
| Size | RF_leaf2 | 0.710 | 0.419 | 0.324 |

*R², RMSE, and MAE are reported from leave-one-out cross-validation (LOOCV) for each target response.*

**Table S2. Permutation feature importance (PFI) expressed as ΔRMSE for each response.**

| **Feature** | **Size** | **EE** | **Burst40** |
| --- | --- | --- | --- |
| Chitosan | 0.962 | 5.966 | 10.010 |
| Palmitic | 0.398 | 5.335 | 8.969 |
| Pluronic | 0.233 | 1.982 | 3.929 |

*Higher ΔRMSE indicates greater dependence of model performance on that factor. ΔRMSE units follow each response (Size in µm; EE and Burst40 in %).*
